# Supplementary material
Source: PubMed Central journal article supplement (PMC3182719)
Supplement: 1105403108_pnas.201105403SI.pdf [file 1105403108_pnas.201105403SI.pdf]

# Supporting Information

Gettler et al. 10.1073/pnas.1105403108

**Table S1. Predicting 2009 partnering and parenting status from 2005 T among single nonfathers at baseline (*n* = 465)\***

| Partnered <sup>†</sup>                | OR <sup>‡</sup>   | <i>P</i> value |
|---------------------------------------|-------------------|----------------|
| AM T                                  | 1.20 (1.01, 1.44) | 0.044          |
| PM T                                  | 1.08 (0.90, 1.30) | 0.393          |
| Partnered and fatherhood <sup>§</sup> | OR                | <i>P</i> value |
| AM T                                  | 1.21 (1.00, 1.45) | 0.048          |
| PM T                                  | 1.11 (0.92, 1.34) | 0.276          |

\*Values of T adjusted for time of saliva collection (AM and PM) and usual wake time (AM). T converted to z score, OR reflects the effects of a 1-SD change.

<sup>†</sup>Odds of becoming partnered between 2005 and 2009 among single men at baseline.

<sup>‡</sup>OR (95% CI).

<sup>§</sup>Odds of becoming partnered and a first-time father between 2005 and 2009 among single nonfathers at baseline.

**Table S2. Predicting longitudinal change in AM T among men who were single nonfathers at baseline (*n* = 465)**

|                                              | ΔAM T*      |                |             |                |
|----------------------------------------------|-------------|----------------|-------------|----------------|
|                                              | Model 1     | <i>P</i> value | Model 2     | <i>P</i> value |
| Change in partnering/fatherhood <sup>†</sup> |             |                |             |                |
| Newly P, never fathers <sup>‡</sup>          | -9.2 ± 13.6 | 0.50           | -8.9 ± 13.7 | 0.52           |
| Newly P, new fathers <sup>§</sup>            | -31.3 ± 8.5 | 0.0003         | -30.9 ± 8.6 | 0.0004         |
| Average self-reported stress <sup>¶</sup>    |             |                | 0.8 ± 1.4   | 0.59           |
| Average sleep quality <sup>¶</sup>           |             |                | 0.2 ± 2.6   | 0.95           |
| Model <i>R</i> <sup>2</sup>                  | 0.028       |                | 0.029       |                |

\*β ± (SEM) values of ΔT adjusted for time of saliva collection and usual wake time.

<sup>†</sup>Excluded comparison: men who were not partnered (P) in 2005 or 2009 and were never fathers (*n* = 257).

<sup>‡</sup>Men who became P between 2005 and 2009 and were never fathers (*n* = 46).

<sup>§</sup>Men who became P and first-time fathers between 2005 and 2009 (*n* = 162).

<sup>¶</sup>Average of 2005 and 2009 values for self-reported psychosocial stress and sleep quality.

**Table S3. Predicting longitudinal change in PM T among men who were single nonfathers at baseline (*n* = 465)**

|                                              | ΔPM T*       |                |             |                |
|----------------------------------------------|--------------|----------------|-------------|----------------|
|                                              | Model 1      | <i>P</i> value | Model 2     | <i>P</i> value |
| Change in partnering/fatherhood <sup>†</sup> |              |                |             |                |
| Newly P, never fathers <sup>‡</sup>          | -13.4 ± 10.0 | 0.18           | -14.0 ± 9.9 | 0.16           |
| Newly P, new fathers <sup>§</sup>            | -22.5 ± 5.8  | 0.0001         | -23.2 ± 5.8 | 0.0001         |
| Average self-reported stress <sup>¶</sup>    |              |                | -0.9 ± 0.9  | 0.35           |
| Average sleep quality <sup>¶</sup>           |              |                | -1.5 ± 1.8  | 0.42           |
| Model <i>R</i> <sup>2</sup>                  | 0.030        |                | 0.032       |                |

\*β ± (SEM) values of ΔT adjusted for time of saliva collection. Regression models were calculated with robust SEs.

<sup>†</sup>Excluded comparison: men who were not partnered (P) in 2005 or 2009 and were never fathers (*n* = 257).

<sup>‡</sup>Men who became P between 2005 and 2009 and were never fathers (*n* = 46).

<sup>§</sup>Men who became P and first time fathers between 2005 and 2009 (*n* = 162).

<sup>¶</sup>Average of 2005 and 2009 values for self-reported psychosocial stress and sleep quality.

**Table S4. Comparison of within-group changes in T between 2005 and 2009\* (n = 624)**

| No. subjects | Partnered/fatherhood status |                                     |         | Mean $\pm$ SD, pg/mL | P value |
|--------------|-----------------------------|-------------------------------------|---------|----------------------|---------|
|              | 2005                        | 2009                                |         |                      |         |
| 257          | Neither                     | Neither                             | AM T 05 | 190.8 $\pm$ 69.9     | 0.0001  |
|              |                             |                                     | AM T 09 | 168.9 $\pm$ 64.2     |         |
|              |                             |                                     | PM T 05 | 119.6 $\pm$ 53.1     |         |
| 46           | Neither                     | Newly P, not father                 | PM T 09 | 100.6 $\pm$ 39.8     | 0.0001  |
|              |                             |                                     | AM T 05 | 199.4 $\pm$ 91.6     |         |
|              |                             |                                     | AM T 09 | 168.3 $\pm$ 55.7     |         |
| 9            | Neither                     | Separated <sup>†</sup> , not father | PM T 05 | 119.2 $\pm$ 48.6     | 0.001   |
|              |                             |                                     | PM T 09 | 86.9 $\pm$ 43.3      |         |
|              |                             |                                     | AM T 05 | 191.1 $\pm$ 38.7     |         |
| 12           | Neither                     | Not P, new father                   | AM T 09 | 219.3 $\pm$ 106.1    | 0.50    |
|              |                             |                                     | PM T 05 | 120.3 $\pm$ 20.0     |         |
|              |                             |                                     | PM T 09 | 96.8 $\pm$ 50.8      |         |
| 162          | Neither                     | Newly P, new father                 | AM T 05 | 178.6 $\pm$ 47.7     | 0.42    |
|              |                             |                                     | AM T 09 | 159.6 $\pm$ 48.8     |         |
|              |                             |                                     | PM T 05 | 131.7 $\pm$ 96.3     |         |
| 35           | P only                      | P, new father                       | PM T 09 | 92.0 $\pm$ 46.7      | 0.25    |
|              |                             |                                     | AM T 05 | 206.6 $\pm$ 78.6     |         |
|              |                             |                                     | AM T 09 | 153.4 $\pm$ 56.1     |         |
| 3            | P only                      | Separated, new father               | PM T 05 | 125.1 $\pm$ 52.3     | 0.0001  |
|              |                             |                                     | PM T 09 | 83.6 $\pm$ 33.8      |         |
|              |                             |                                     | AM T 05 | 172.9 $\pm$ 74.2     |         |
| 4            | Father only                 | Not P, father                       | AM T 09 | 140.1 $\pm$ 64.8     | 0.05    |
|              |                             |                                     | PM T 05 | 108.7 $\pm$ 45.9     |         |
|              |                             |                                     | PM T 09 | 75.8 $\pm$ 28.7      |         |
| 11           | Father only                 | Newly P, father                     | AM T 05 | 229.6 $\pm$ 36.3     | 0.24    |
|              |                             |                                     | AM T 09 | 173.0 $\pm$ 56.8     |         |
|              |                             |                                     | PM T 05 | 176.3 $\pm$ 47.7     |         |
| 2            | P, father                   | Separated, father                   | PM T 09 | 150.0 $\pm$ 66.0     | 0.89    |
|              |                             |                                     | AM T 05 | 253.9 $\pm$ 153.2    |         |
|              |                             |                                     | AM T 09 | 150.2 $\pm$ 36.6     |         |
| 83           | P, father                   | P, father                           | PM T 05 | 138.0 $\pm$ 56.7     | 0.61    |
|              |                             |                                     | PM T 09 | 139.4 $\pm$ 57.2     |         |
|              |                             |                                     | AM T 05 | 193.9 $\pm$ 80.6     |         |
| 2            | P, father                   | Separated, father                   | AM T 09 | 136.7 $\pm$ 30.8     | 0.03    |
|              |                             |                                     | PM T 05 | 124.6 $\pm$ 51.3     |         |
|              |                             |                                     | PM T 09 | 85.0 $\pm$ 28.7      |         |
| 83           | P, father                   | P, father                           | AM T 05 | 147.6 $\pm$ 108.8    | 0.77    |
|              |                             |                                     | AM T 09 | 165.5 $\pm$ 42.8     |         |
|              |                             |                                     | PM T 05 | 85.3 $\pm$ 7.3       |         |
| 83           | P, father                   | P, father                           | PM T 09 | 114.6 $\pm$ 12.2     | 0.28    |
|              |                             |                                     | AM T 05 | 178.4 $\pm$ 61.1     |         |
|              |                             |                                     | AM T 09 | 161.3 $\pm$ 61.1     |         |
| 83           | P, father                   | P, father                           | PM T 05 | 96.0 $\pm$ 37.2      | 0.37    |
|              |                             |                                     | PM T 09 | 91.1 $\pm$ 38.4      |         |

\*Values adjusted for time of saliva collection (AM and PM) and usual wake time (AM).

<sup>†</sup>Not partnered (P) in 2005, became P, and then separated from partner between 2005 and 2009.

**Table S5. Predicting longitudinal change in AM T among men who were single nonfathers at baseline: Comparing new fathers with men who remained nonfathers (*n* = 465)**

|                                                               | ΔAM T*       |                |              |                |
|---------------------------------------------------------------|--------------|----------------|--------------|----------------|
|                                                               | Model 1      | <i>P</i> value | Model 2      | <i>P</i> value |
| New fathers (stratified by youngest child's age) <sup>†</sup> |              |                |              |                |
| Fathers of newborns <sup>‡</sup>                              | -81.3 ± 21.1 | 0.0001         | -81.3 ± 21.2 | 0.0001         |
| Fathers of nonnewborn infants <sup>§</sup>                    | -18.8 ± 12.3 | 0.13           | -18.1 ± 12.4 | 0.15           |
| Fathers of children older than 1 y <sup>  </sup>              | -27.1 ± 10.2 | 0.008          | -26.7 ± 10.2 | 0.01           |
| Average self-reported stress <sup>  </sup>                    |              |                | 0.9 ± 1.4    | 0.52           |
| Average sleep quality <sup>  </sup>                           |              |                | 0.7 ± 2.6    | 0.77           |
| Model <i>R</i> <sup>2</sup>                                   | 0.043        |                | 0.044        |                |

\*β ± (SEM) values of ΔT adjusted for time of saliva collection and usual wake time.

<sup>†</sup>Excluded comparison: men who were not partnered (*P*) in 2005 and were never fathers (*n* = 303).

<sup>‡</sup>Not *P* in 2005 and first-time fathers between 2005 and 2009; youngest child is 1 mo old or less (*n* = 17).

<sup>§</sup>Not *P* in 2005 and first-time fathers between 2005 and 2009; youngest child is older than 1 mo of age but 1 y old or less (*n* = 56).

<sup>||</sup>Not *P* in 2005 and first-time fathers between 2005 and 2009; youngest child is older than 1 y of age (*n* = 89).

<sup>||</sup>Average of 2005 and 2009 values for self-reported psychosocial stress and sleep quality.

**Table S6. Predicting longitudinal change in PM T among men who were single nonfathers at baseline: Comparing new fathers with men who remained nonfathers (*n* = 465)**

|                                                               | ΔPM T*       |                |              |                |
|---------------------------------------------------------------|--------------|----------------|--------------|----------------|
|                                                               | Model 1      | <i>P</i> value | Model 2      | <i>P</i> value |
| New fathers (stratified by youngest child's age) <sup>†</sup> |              |                |              |                |
| Fathers of newborns <sup>‡</sup>                              | -51.1 ± 16.0 | 0.002          | -51.0 ± 16.1 | 0.002          |
| Fathers of nonnewborn infants <sup>§</sup>                    | -25.4 ± 6.9  | 0.0003         | -26.1 ± 6.9  | 0.0002         |
| Fathers of children older than 1 y <sup>  </sup>              | -11.5 ± 6.7  | 0.09           | -12.0 ± 6.7  | 0.08           |
| Average self-reported stress <sup>  </sup>                    |              |                | -0.8 ± 0.9   | 0.38           |
| Average sleep quality <sup>  </sup>                           |              |                | -1.1 ± 1.8   | 0.56           |
| Model <i>R</i> <sup>2</sup>                                   | 0.040        |                | 0.042        |                |

\*β ± (SEM) values of ΔT adjusted for time of saliva collection. Regression models were calculated with robust SEs.

<sup>†</sup>Excluded comparison: men who were not partnered (*P*) in 2005 and were never fathers (*n* = 303).

<sup>‡</sup>Not *P* in 2005 and first-time fathers between 2005 and 2009; youngest child is 1 mo old or less (*n* = 17).

<sup>§</sup>Not *P* in 2005 and first-time fathers between 2005 and 2009; youngest child is older than 1 mo of age but 1 y old or less (*n* = 56).

<sup>||</sup>Not *P* in 2005 and first-time fathers between 2005 and 2009; youngest child is older than 1 y of age (*n* = 89).

<sup>||</sup>Average of 2005 and 2009 values for self-reported psychosocial stress and sleep quality.

**Table S7. Predicting longitudinal change in AM T among men who were single nonfathers at baseline: Comparing fathers without newborn infants with fathers of newborns (*n* = 162)**

|                                                               | ΔAM T*      |                |              |                |
|---------------------------------------------------------------|-------------|----------------|--------------|----------------|
|                                                               | Model 1     | <i>P</i> value | Model 2      | <i>P</i> value |
| New fathers (stratified by youngest child's age) <sup>†</sup> |             |                |              |                |
| Fathers of nonnewborn infants <sup>‡</sup>                    | 62.5 ± 23.8 | 0.009          | 65.6 ± 24.1  | 0.007          |
| Fathers of children older than 1 y <sup>§</sup>               | 54.2 ± 22.7 | 0.018          | 53.0 ± 23.0  | 0.023          |
| Average self-reported stress <sup>  </sup>                    |             |                | -2.3 ± 2.7   | 0.391          |
| Average sleep quality <sup>  </sup>                           |             |                | 2.5 ± 4.6    | 0.590          |
| Daily physical care <sup>  </sup>                             |             |                |              |                |
| 3 h or more of care                                           |             |                | -54.2 ± 29.9 | 0.072          |
| Model <i>R</i> <sup>2</sup>                                   | 0.043       |                | 0.070        |                |

\*β ± (SEM) values of ΔT adjusted for time of saliva collection and usual wake time.

<sup>†</sup>Excluded comparison: men who were not partnered (*P*) in 2005 and first-time fathers between 2005 and 2009; youngest child is 1 mo old or less (*n* = 17).

<sup>‡</sup>Not *P* in 2005 and first-time fathers between 2005 and 2009; youngest child is older than 1 mo of age but 1 y old or less (*n* = 56).

<sup>§</sup>Not *P* in 2005 and first-time fathers between 2005 and 2009; youngest child is older than 1 y of age (*n* = 89).

<sup>||</sup>Average of 2005 and 2009 values for self-reported psychosocial stress and sleep quality.

<sup>||</sup>Excluded comparison: fathers reporting no involvement in daily physical care of their children in 2009.
